# Supplementary material for: A dual-responsive hyperbranched supramolecular polymer constructed by cooperative host–guest recognition and hydrogen-bond interactions
Source: Royal Society of Chemistry journal article supplement (doi:10.1039/c8cc08226j), 2018-01-01
Supplement: c8cc08226j1.pdf [file c8cc08226j1.pdf]

## Supporting Information for

# **A dual-responsive hyperbranched supramolecular polymer constructed by cooperative host–guest recognition and hydrogen-bond interactions**

Yu-Qin Jiang, Kai Wu, Qian Zhang\*, Ke-Qing Li, Yan-Yan Li, Peng-Yang Xin, Wei-Wei Zhang and Hai-Ming Guo\*

## Contents

|                                                                                                                                                                                                             |            |
|-------------------------------------------------------------------------------------------------------------------------------------------------------------------------------------------------------------|------------|
| <b>1. General information</b>                                                                                                                                                                               | <b>S2</b>  |
| <b>2. Synthesis and characterization of all compounds</b>                                                                                                                                                   | <b>S3</b>  |
| <b>3. Determination of the binding stoichiometry, association constant and the maximum possible polymerization degrees (<math>n_{\max}</math> values) of HSP-H<sub>3</sub>G at different concentrations</b> | <b>S16</b> |
| <b>4. Dosy experiments</b>                                                                                                                                                                                  | <b>S25</b> |
| <b>5. Viscosity experiments</b>                                                                                                                                                                             | <b>S25</b> |
| <b>6. The morphology of the supramolecular polymer HSP-H<sub>3</sub>G</b>                                                                                                                                   | <b>S26</b> |

## 1. General information

$^1\text{H}$  NMR (Nuclear Magnetic Resonance) spectroscopy were recorded on BRUKER 400 MHz or BRUKER 600 MHz. Data were reported as follows: chemical shift, multiplicity (s = singlet, d = doublet, t = triplet, q = quaternary, m = multiplet, br = broad), coupling constants (Hz), integration.  $^{13}\text{C}$  NMR data were collected on commercial instruments (101/151MHz) with complete proton decoupling. Chemical shifts were reported in ppm from the tetramethylsilane with the solvent resonance as internal standard. DOSY spectra were recorded on commercial instruments (BRUKER 600). Mass spectra were recorded by means of MALDI-TOF or ESI or EI techniques. Viscosity measurements were carried out with Brookfield viscometers at 293K in chloroform. Samples for SEM measurement were prepared by drop-casting onto silicon substrates, and the images were acquired by a JSM-6390LV. Melting points (m. p.) were determined using commercial apparatus and were not corrected. All solvents were purified and dried according to standard methods prior to use, unless stated otherwise.

## 2. General procedure for the synthesis and characterization of compound **H**<sub>3</sub>.

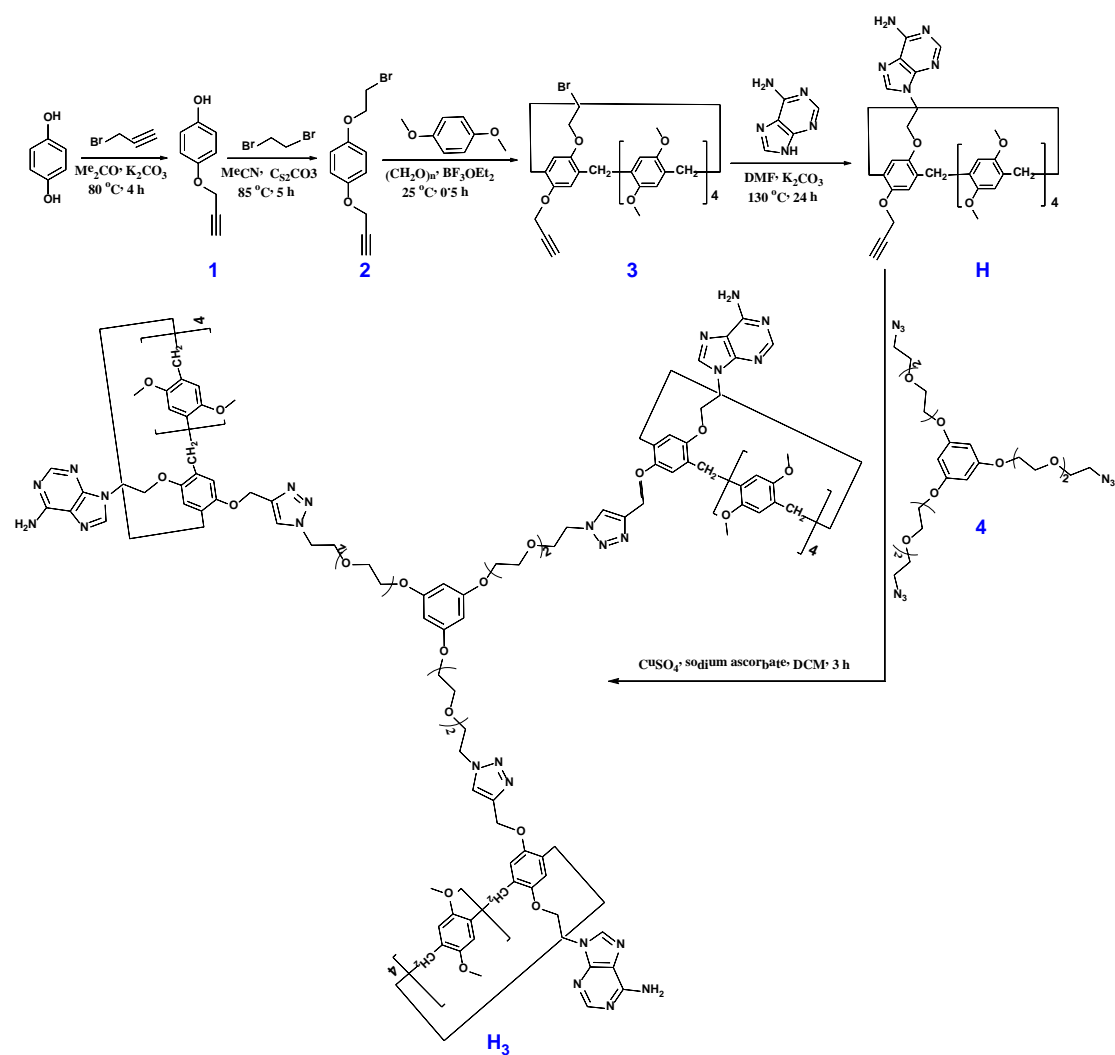

Scheme S1 the synthesis of compound **H**<sub>3</sub>

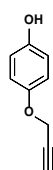

Under a nitrogen atmosphere, hydroquinone (1.10g, 10.0 mmol) and potassium carbonate (2.07g, 15.0 mmol) were added into 50 mL acetone. The mixture was stirred for 30 minutes. Then bromopropyne (1.18g, 15.0 mmol) was added dropwise and the reaction mixture was stirred at reflux for another 4 h. After cooled to room temperature, the reaction mixture was filtered and the solvent was removed under vacuum. The residue was purified by column chromatography (eluent: petroleum

ether/ ethyl acetate 20:1) to give compound **1** as a pale yellow oil (0.86g, 58% yield). Lit: yellow oil <sup>S1</sup>).

<sup>1</sup>H NMR (CDCl<sub>3</sub>, 400 MHz, 298K)  $\delta$  (ppm): 6.88 (d,  $J$  = 9.2 Hz, 2H), 6.78 (d,  $J$  = 8.8 Hz, 2H), 4.63 (d,  $J$  = 2.4 Hz, 2H), 4.43 (s, 1H), 2.51 (t,  $J$  = 2.4 Hz, 1H). <sup>13</sup>C NMR (CDCl<sub>3</sub>, 101 MHz, 298K)  $\delta$  151.7, 150.3, 116.4, 116.1, 78.9, 75.4, 56.7. MS (EI):  $m/z$  for C<sub>9</sub>H<sub>8</sub>O<sub>2</sub><sup>+</sup>: 148.

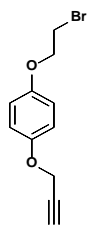

Under a nitrogen atmosphere, compound **1** (0.86 g, 6.0 mmol) and cesium carbonate (0.94 g, 3.0 mmol) was added to 40 mL acetonitrile. The mixture was stirred for 30 minutes. Then 1, 2-dibromoethane (3.35g, 17.0 mmol) was added dropwise and the mixture was stirred at reflux for another 5 h. After cooled to room temperature, the reaction mixture was filtered and the solvent was removed. The remaining solid was added to CH<sub>2</sub>Cl<sub>2</sub> (50 ml) and washed with H<sub>2</sub>O (25 mL). The aqueous layer was washed with CH<sub>2</sub>Cl<sub>2</sub> (2 × 20 mL). Then organic phase was combined and dried over anhydrous Na<sub>2</sub>SO<sub>4</sub>. After the solvent was removed under vacuum, the residue was purified by column chromatography (eluent: petroleum ether/ ethyl acetate 25:1) to give compound **2** as a white solid (0.56g, 38% yield).

m. p. 41.5-42.7 °C. <sup>1</sup>H NMR (CDCl<sub>3</sub>, 400 MHz, 298K)  $\delta$  6.93 (d,  $J$  = 9.2 Hz, 2H), 6.87 (d,  $J$  = 9.2 Hz, 2H), 4.65 (d,  $J$  = 2.4 Hz, 2H), 4.24 (t,  $J$  = 6.2 Hz, 2H), 3.61 (t,  $J$  = 6.2 Hz, 2H), 2.51 (t,  $J$  = 2.4 Hz, 1H). <sup>13</sup>C NMR (CDCl<sub>3</sub>, 101 MHz, 298 K)  $\delta$  152.9, 152.3, 116.2, 115.9, 78.8, 77.4, 68.7, 56.5, 29.3. MS (EI):  $m/z$  for C<sub>11</sub>H<sub>12</sub>BrO<sub>2</sub><sup>+</sup> 254.

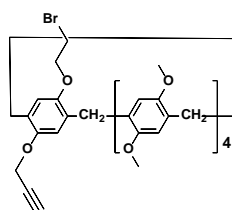

Under a nitrogen atmosphere, compound **1** (0.25g, 1.0 mmol), 1, 4-dimethoxybenzene (2.21g, 16.0 mmol) and paraformaldehyde (1.44g, 48.0 mmol) was added to 60 mL 1,2-dichloroethane. The mixture was stirred for 30 minutes at

25°C. Then boron trifluoride etherate (2.41g, 17.0 mmol) was added dropwise and the mixture was stirred at 25 °C. When the starting material was consumed completely (detected by Thin layer chromatography, TLC), the mixture was poured into 100 mL CH<sub>3</sub>OH. The reaction mixture was filtered and the filtrate was removed under vacuum. The residue was purified by column chromatography (eluent: CH<sub>2</sub>Cl<sub>2</sub>) to give compound **3** as an off-white solid (0.11g, 13% yield).

m. p. 108.9 – 110.4 °C. <sup>1</sup>H NMR (400 MHz, CDCl<sub>3</sub>, 298K) δ 6.80 (s, 2H), 6.79 (s, 1H), 6.78 (s, 1H), 6.77 (s, 2H), 6.75 – 6.73 (m, 4H), 5.11 (s, 1H), 4.43 (d, *J* = 2.0Hz, 2H), 4.12 (t, *J* = 6.2 Hz, 2H), 3.82 (s, 2H), 3.78 (d, *J* = 3.2 Hz, 6H), 3.76 (s, 2H), 3.69 (s, 6H), 3.68 (t, *J* = 0.8 Hz, 9H), 3.66 (s, 3H), 3.65 (s, 3H), 3.62 (s, 3H), 3.52 (t, *J* = 6.0Hz, 2H), 1.83 (t, *J* = 2.4 Hz, 1H). <sup>13</sup>C NMR (101 MHz, CDCl<sub>3</sub>, 298K) δ 150.8, 150.7, 150.6, 149.5, 149.4, 129.2, 129.0, 128.6, 128.4, 148.4, 128.2, 128.1, 127.6, 115.9, 115.5, 114.4, 114.2, 114.1, 113.9, 113.8, 78.7, 74.8, 68.9, 56.1, 55.9, 55.8, 55.7, 53.0, 30.3, 30.0, 29.7, 29.5, 29.2. HRMS (MALDI-TOF-MS) *m/z* calcd for [M]<sup>+</sup> C<sub>48</sub>H<sub>52</sub>BrO<sub>10</sub><sup>+</sup>, 866.2744, found 866.2644.

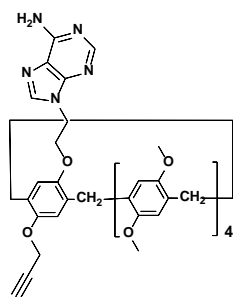

To the solution of adenine (0.81g, 6.0 mmol) and potassium carbonate (0.83g, 6.0 mmol) in 15mL DMF, compound **3** (0.87g, 1.0 mmol) was added. The reaction mixture was stirred at 130°C and detected by TLC. After compound **3** was consumed completely, the reaction mixture was filtered and the solvent was removed under vacuum. The remaining solid was added to CH<sub>2</sub>Cl<sub>2</sub> (50 ml) and washed with H<sub>2</sub>O (25 mL) The aqueous layer was washed with CH<sub>2</sub>Cl<sub>2</sub> (2 × 20 mL). Then organic phase was combined and dried over anhydrous Na<sub>2</sub>SO<sub>4</sub>. After the solvent was removed, the residue was purified by column chromatography (eluent: CH<sub>2</sub>Cl<sub>2</sub> / MeOH = 50:1) to give **H** as a pale yellow solid (0.46g, 50% yield).

m. p. 147.6–149.3 °C. <sup>1</sup>H NMR (400 MHz, CDCl<sub>3</sub>, 298K) δ 8.38 (s, 1H), 8.05 (s, 1H), 6.80 (s, 2H), 6.76 (s, 1H), 6.73 (s, 1H), 6.72 (s, 1H), 6.71 (s, 1H), 6.69 (s, 1H), 6.68 (s,

2H), 6.48 (s, 1H), 5.72 (s, 2H), 4.55 (t,  $J = 4.8$  Hz, 2H), 4.34 (d,  $J = 2.4$  Hz, 2H), 4.21 (t,  $J = 4.8$  Hz, 2H), 3.77 (s, 6H), 3.73 (s, 2H), 3.71 (s, 2H), 3.69 (s, 3H), 3.67 (s, 3H), 3.66 (s, 6H), 3.62 (s, 3H), 3.59 (s, 3H), 3.54 (s, 6H), 1.54 (t,  $J = 2.4$  Hz, 1H).  $^{13}\text{C}$  NMR (151 MHz,  $\text{CDCl}_3$ )  $\delta$  154.5, 151.9, 149.8, 149.7, 149.6, 149.5, 148.9, 148.3, 148.1, 140.3, 127.9, 127.7, 127.6, 127.5, 127.4, 127.3, 127.1, 127.0, 126.9, 126.3, 118.4, 114.3, 113.4, 113.3, 113.0, 112.9, 112.7, 77.2, 73.7, 65.8, 54.9, 54.8, 54.7, 51.9, 42.5, 29.7, 28.9, 28.5, 28.4, 27.6. HRMS (ESI):  $m/z$  Calcd for  $\text{C}_{53}\text{H}_{56}\text{N}_5\text{O}_{10}$   $[\text{M}+\text{H}]^+$ : 922.2027, found 922.2184.

**Compound 4** was synthesized according to the reported method.<sup>S2</sup>

Yellow oil (Lit: yellow oil<sup>S2</sup>);  $^1\text{H}$  NMR (600 MHz,  $\text{CDCl}_3$ , 298K)  $\delta$  6.11 (s, 3H), 4.07 (t,  $J = 4.8$  Hz, 6H), 3.83 (t,  $J = 4.8$  Hz, 6H), 3.73 – 3.71 (m, 6H), 3.69 – 3.67 (m, 12H), 3.38 (t,  $J = 6.0$  Hz, 6H).  $^{13}\text{C}$  NMR (151 MHz,  $\text{CDCl}_3$ , 298K)  $\delta$  160.5, 94.4, 70.9, 70.7, 70.1, 69.8, 67.4, 50.7. HRMS(ESI):  $m/z$  Calcd for  $\text{C}_{24}\text{H}_{39}\text{N}_9\text{O}_9$   $\text{Na}[\text{M}+\text{Na}]^+$ : 620.2768, found 620.2731.

**Synthesis of H3:** The mixture solution of **H** (303.9 mg, 0.3 mmol), compound **3** (59.7 mg, 0.1 mmol), copper sulfate (6.0 mg, 0.03 mmol), sodium ascorbate (11.9 mg, 0.06 mmol) in 4 ml tert-butanol/water (1:1, V/V) was stirred at 50 °C. The reaction was monitored by TLC. After the reaction was completed, 10 ml water was added and the mixture is extracted with  $\text{CH}_2\text{Cl}_2$ . Then the organic phases were combined and dried over anhydrous  $\text{Na}_2\text{SO}_4$ . After the solvent was removed, the residue was purified by column chromatography (eluent:  $\text{CH}_2\text{Cl}_2/\text{MeOH} = 20:1$ ) to give **H3** as a pure pale yellow powdery solid (252.1 mg, 75% yield).

m. p. 124.0 – 127.2 °C.  $^1\text{H}$  NMR (400 MHz,  $\text{CDCl}_3$ )  $\delta$  8.37 (s, 3H), 8.05 (s, 3H), 7.16 (s, 3H), 6.89 (s, 9H), 6.85 (s, 3H), 6.82 (s, 6H), 6.79 (s, 3H), 6.70 (s, 3H), 6.69 (s, 3H), 6.54 (s, 1H), 5.94 (s, 3H), 5.27 (s, 6H), 4.57 (t,  $J = 4.4$  Hz, 6H), 4.26 (t,  $J = 4.4$  Hz, 6H), 3.99 (t,  $J = 4.4$  Hz, 6H), 3.79 (s, 6H), 3.76 (s, 6H), 3.74 (s, 12H), 3.73 (s, 12H), 3.72 (s, 18H), 3.69 (s, 12H), 3.64 (s, 12H), 3.45 (s, 18H), 3.39 (s, 9H), 2.90 (t,  $J = 4.2$  Hz, 6H), 2.62 (t,  $J = 4.4$  Hz, 6H), 2.12 (s, 6H), 1.93 (t,  $J = 6.4$  Hz, 6H), 1.72 (t,  $J = 6.4$  Hz, 6H).  $^{13}\text{C}$  NMR (101 MHz,  $\text{CDCl}_3$ )  $\delta$  155.6, 153.1, 150.9, 150.8, 150.7, 150.6, 150.5, 150.4, 150.0, 149.3, 148.9, 144.3, 141.1, 129.4, 128.8, 128.7, 128.5, 128.3,

128.2, 127.8, 124.2, 119.3, 115.9, 115.1, 114.5, 114.2, 114.1, 114.0, 113.9, 113.4, 71.6, 67.9, 67.8, 67.6, 67.2, 61.9, 61.5, 56.1, 56.0, 55.9, 55.8, 55.7, 55.6, 49.8, 43.7, 29.7, 29.6, 29.4, 29.2, 28.7. MALDI-TOF-MS:  $m/z$  calcd for  $C_{183}H_{204}N_{24}O_{39}Na^+$   $[M+Na]^+$ : 3386.4676, found 3386.4661.

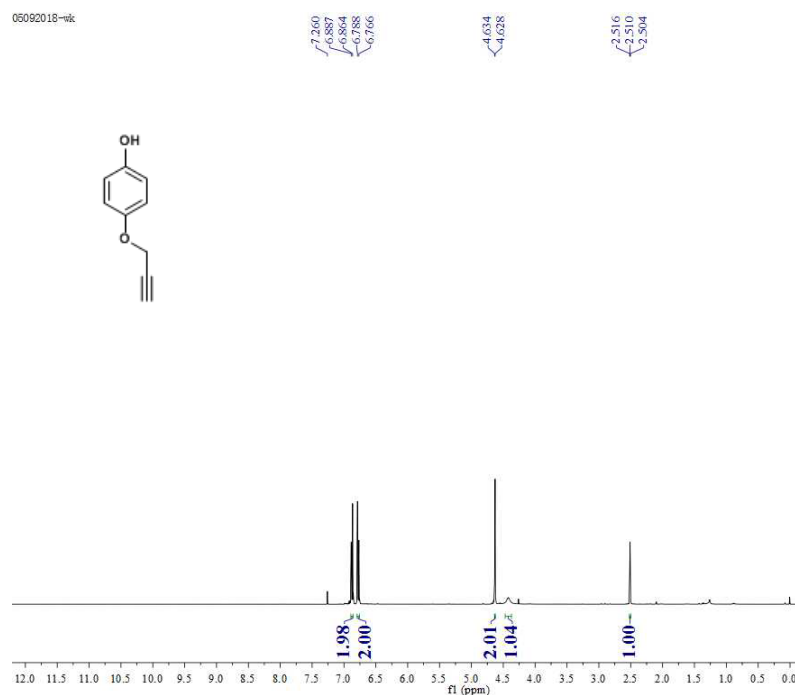

**Fig. S1**  $^1H$  NMR spectrum of compound **1** in  $CDCl_3$ .

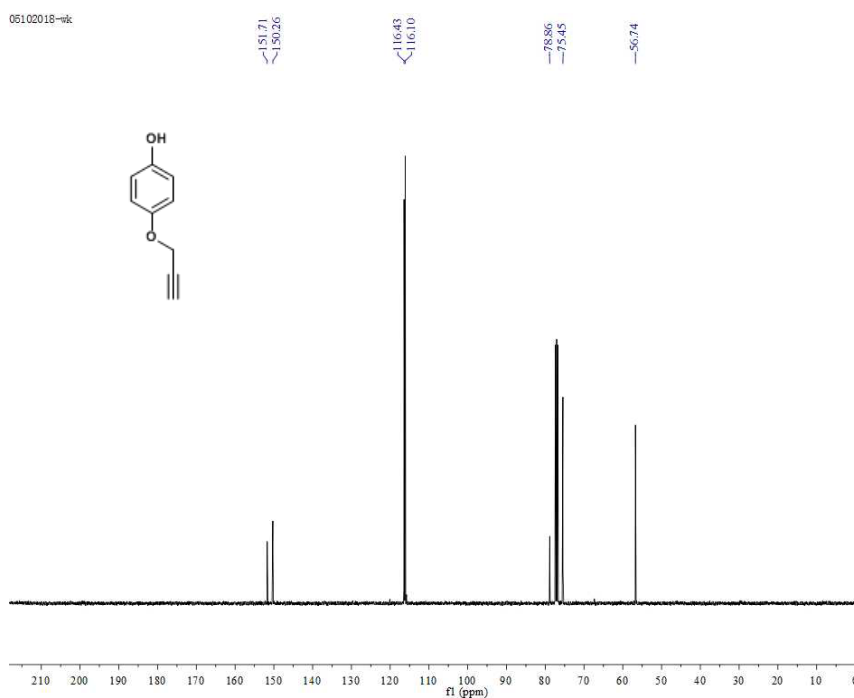

**Fig. S2**  $^{13}C$  NMR spectrum of compound **1** in  $CDCl_3$ .

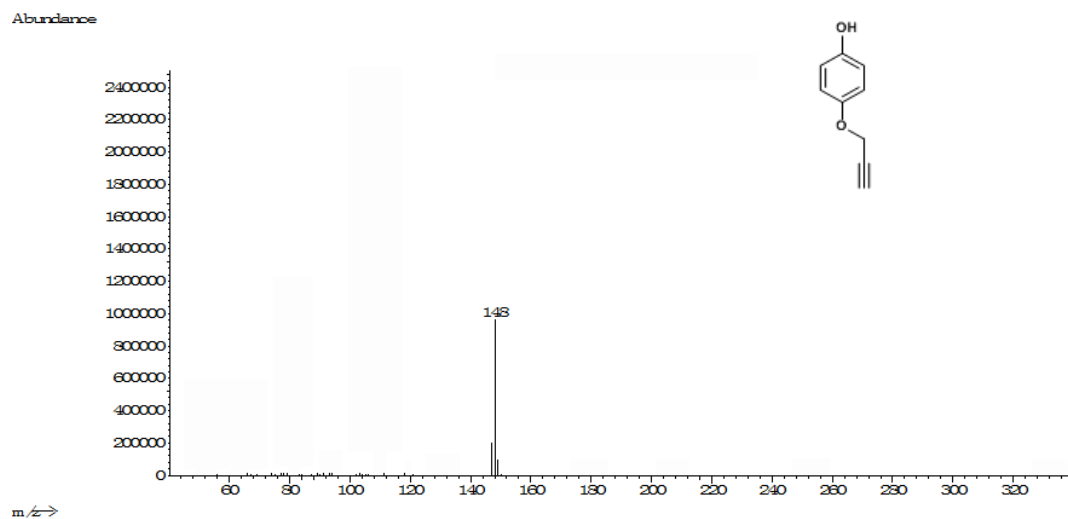

**Fig. S3** EI-MS of compound **1**.

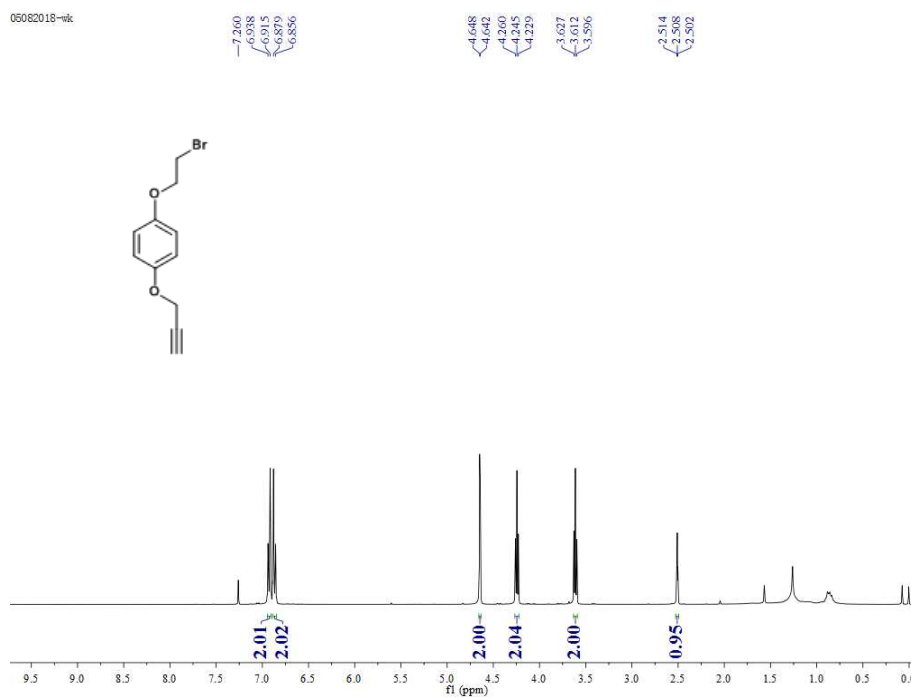

**Fig. S4**  $^1\text{H}$  NMR spectrum of compound **2** in  $\text{CDCl}_3$ .

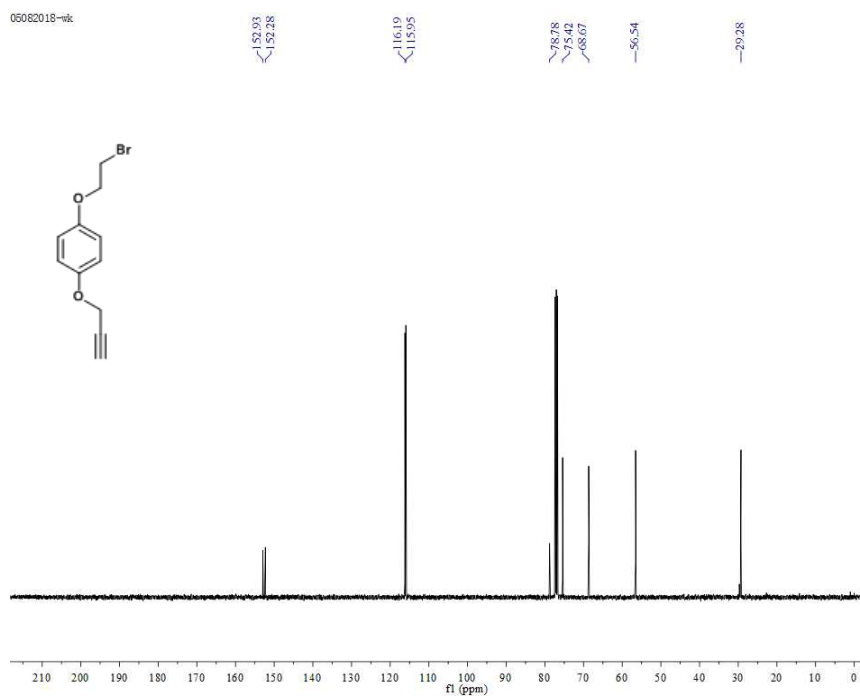

**Fig. S5**  $^{13}\text{C}$  NMR spectrum of compound **2** in  $\text{CDCl}_3$ .

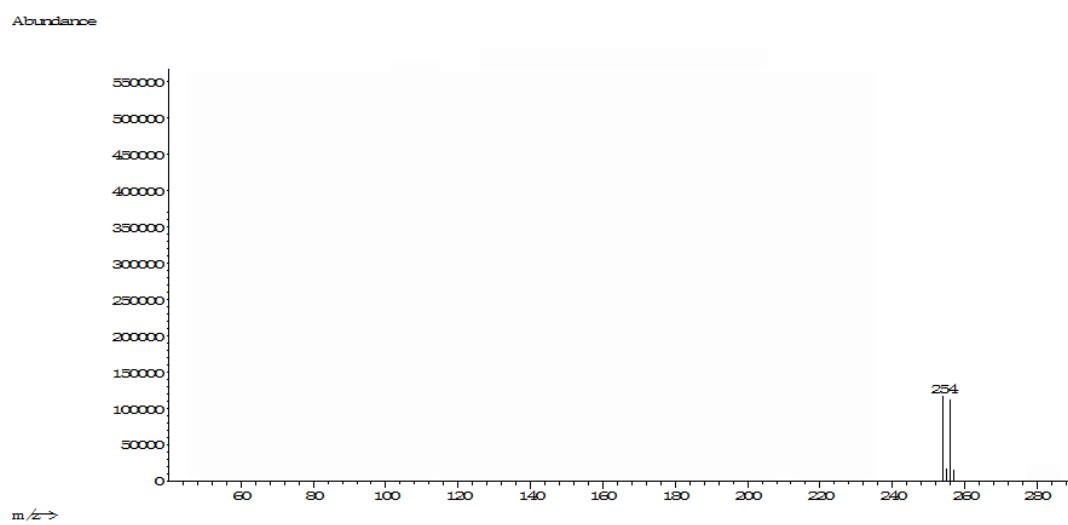

**Fig. S6** EI-MS of Compound **2**.

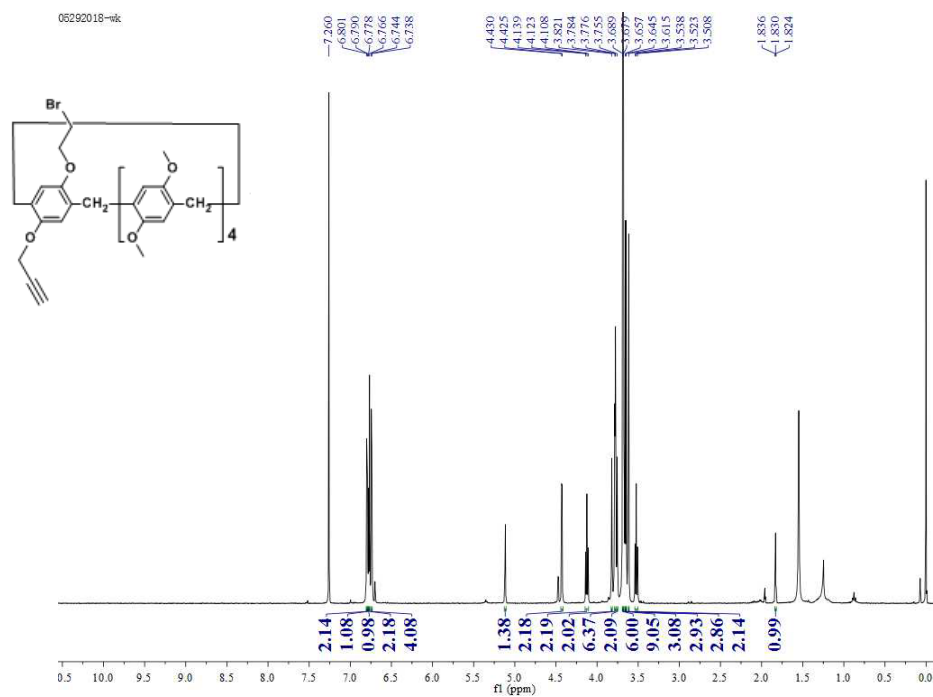

**Fig. S7**  $^1\text{H}$  NMR spectrum of compound 3 in  $\text{CDCl}_3$ .

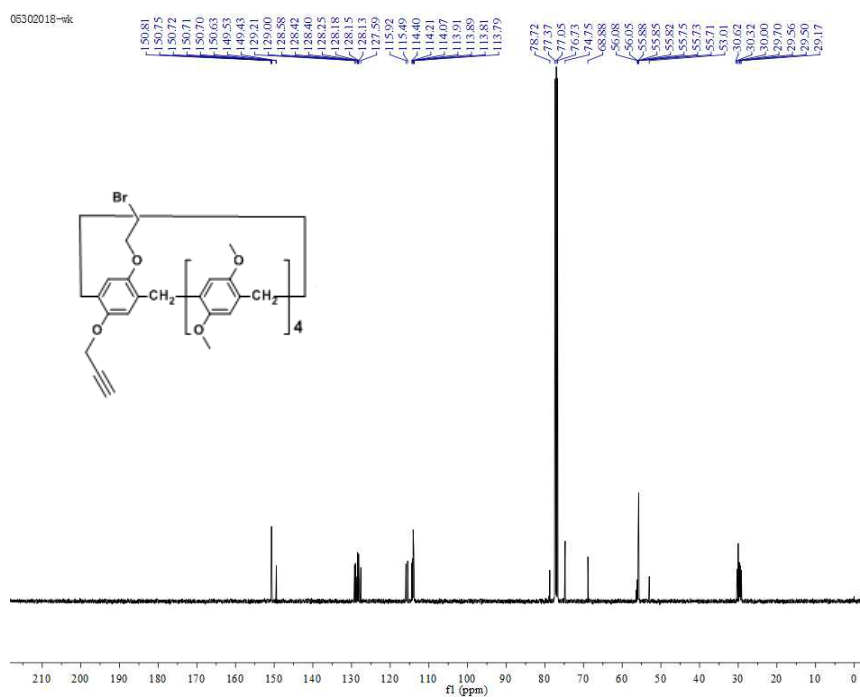

**Fig. S8**  $^{13}\text{C}$  NMR spectrum of compound 3 in  $\text{CDCl}_3$ .

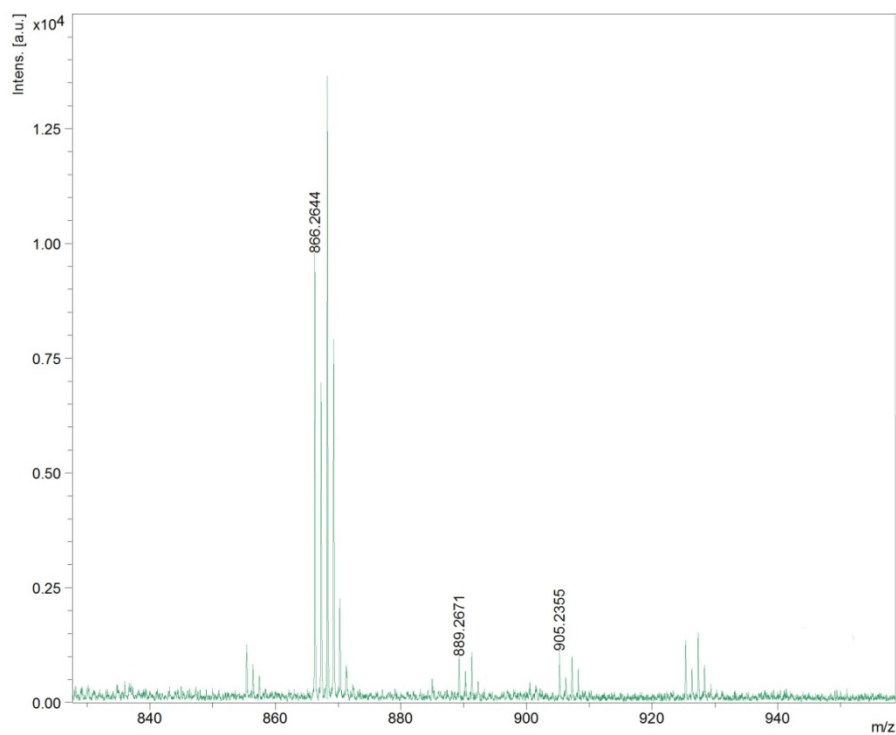

**Fig. S9** MALDI-TOF-MS spectrum of compound **3**.

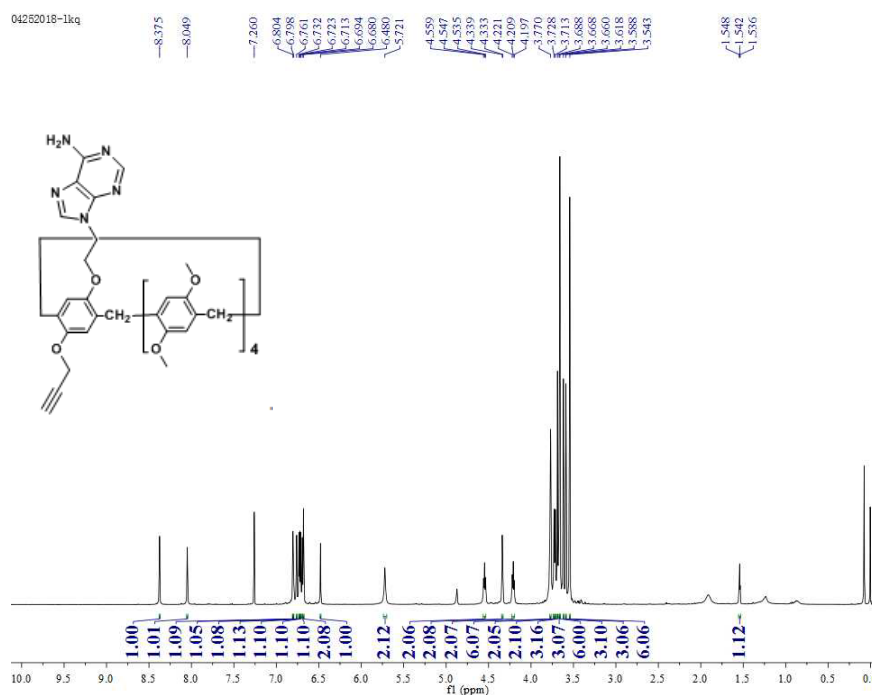

**Fig. S10**  $^1\text{H}$  NMR spectrum of **H** in  $\text{CDCl}_3$ .

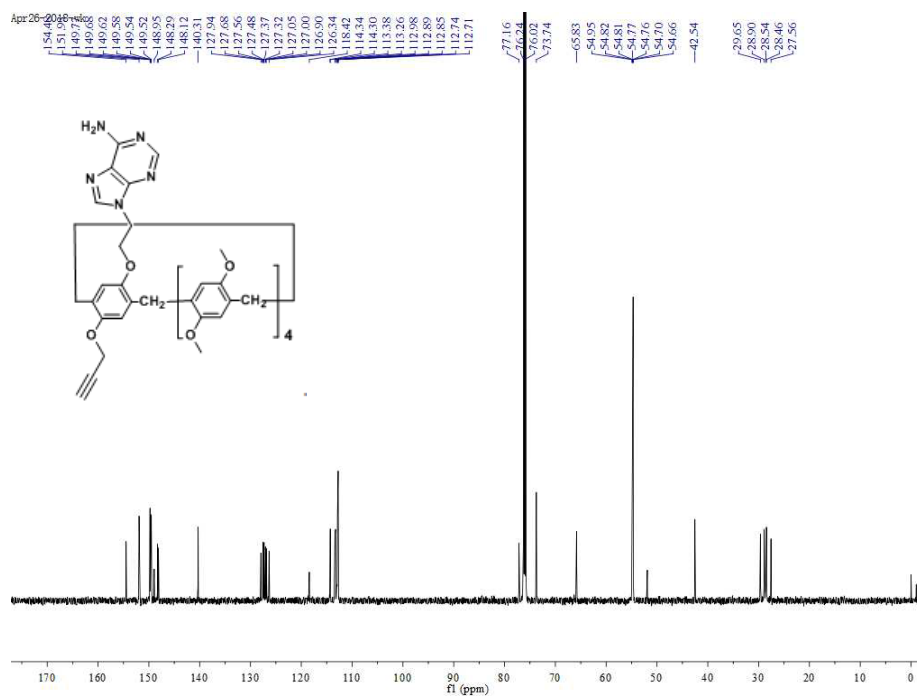

**Fig. S11**  $^{13}\text{C}$  NMR spectrum of **H** in  $\text{CDCl}_3$ .

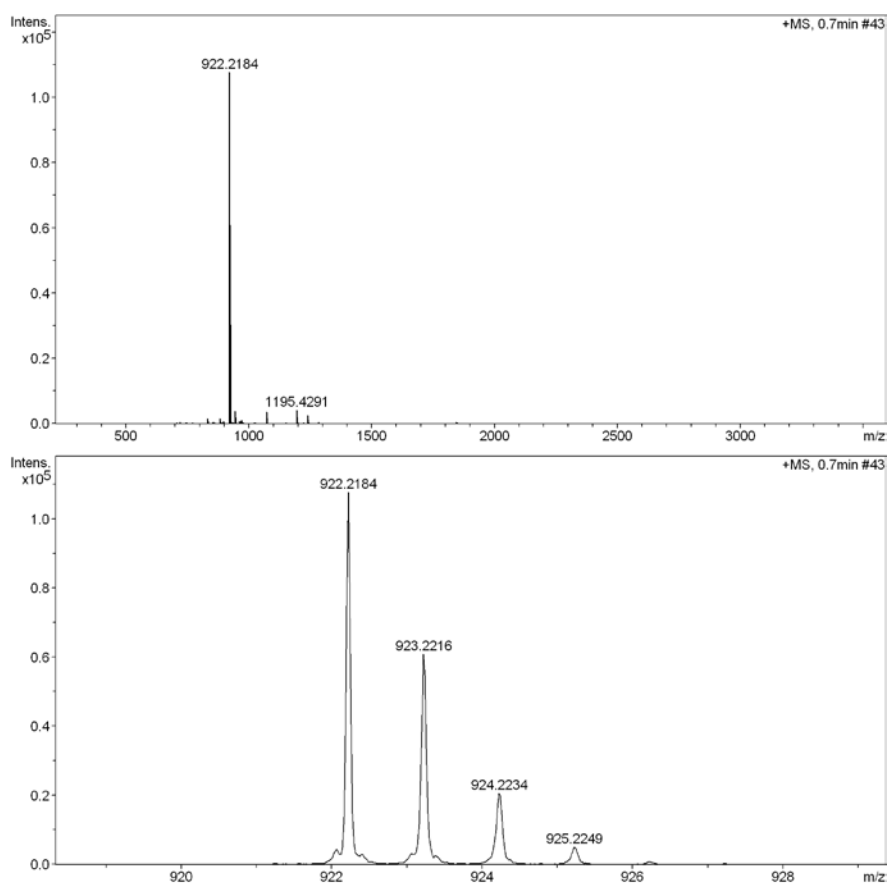

**Fig. S12** HR-MS of **H**.

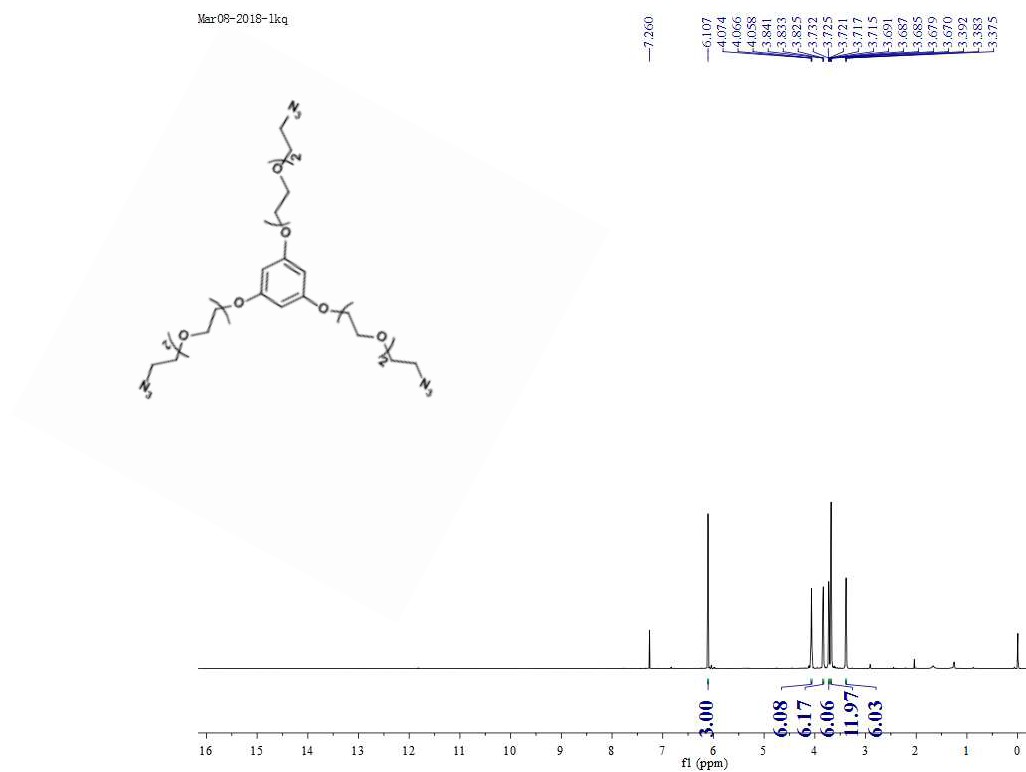

**Fig. S13**  $^1\text{H}$  NMR spectrum of compound **4** in  $\text{CDCl}_3$ .

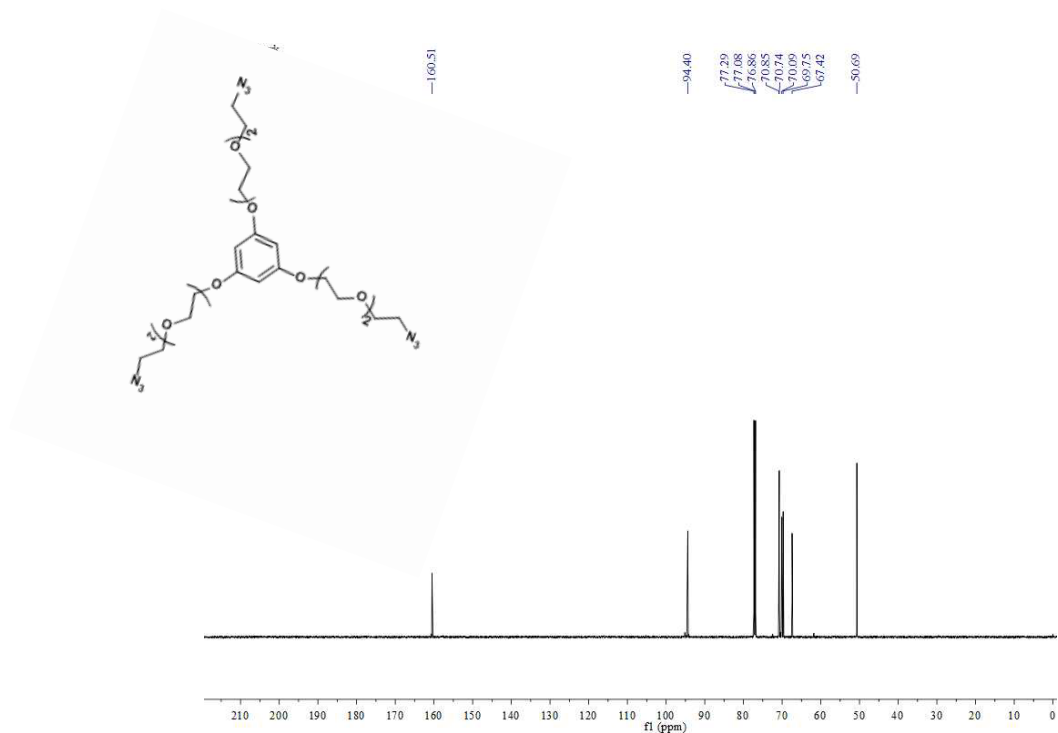

**Fig. S14**  $^{13}\text{C}$  NMR spectrum of compound **4** in  $\text{CDCl}_3$ .

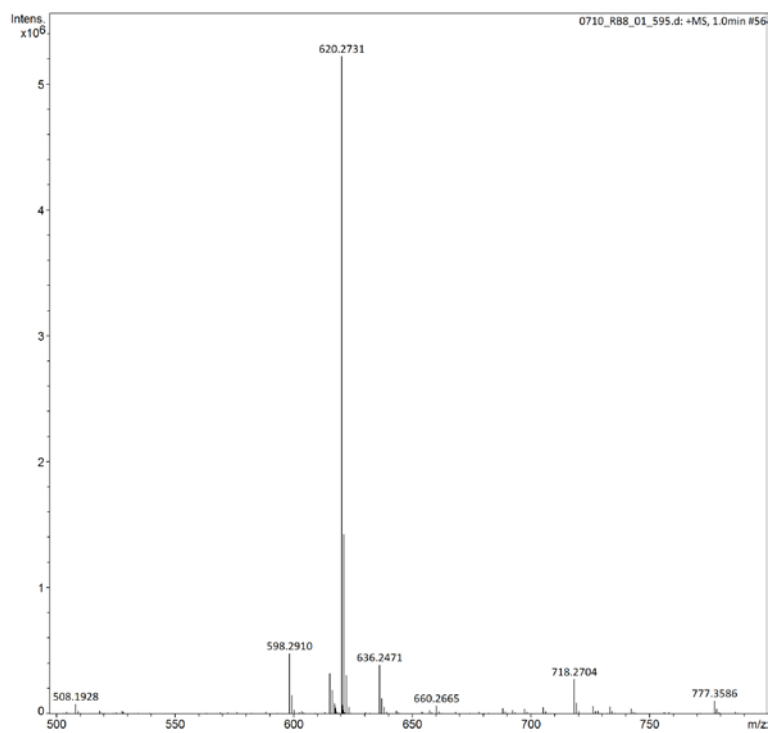

**Fig. S15** HR-MS of compound **4**.

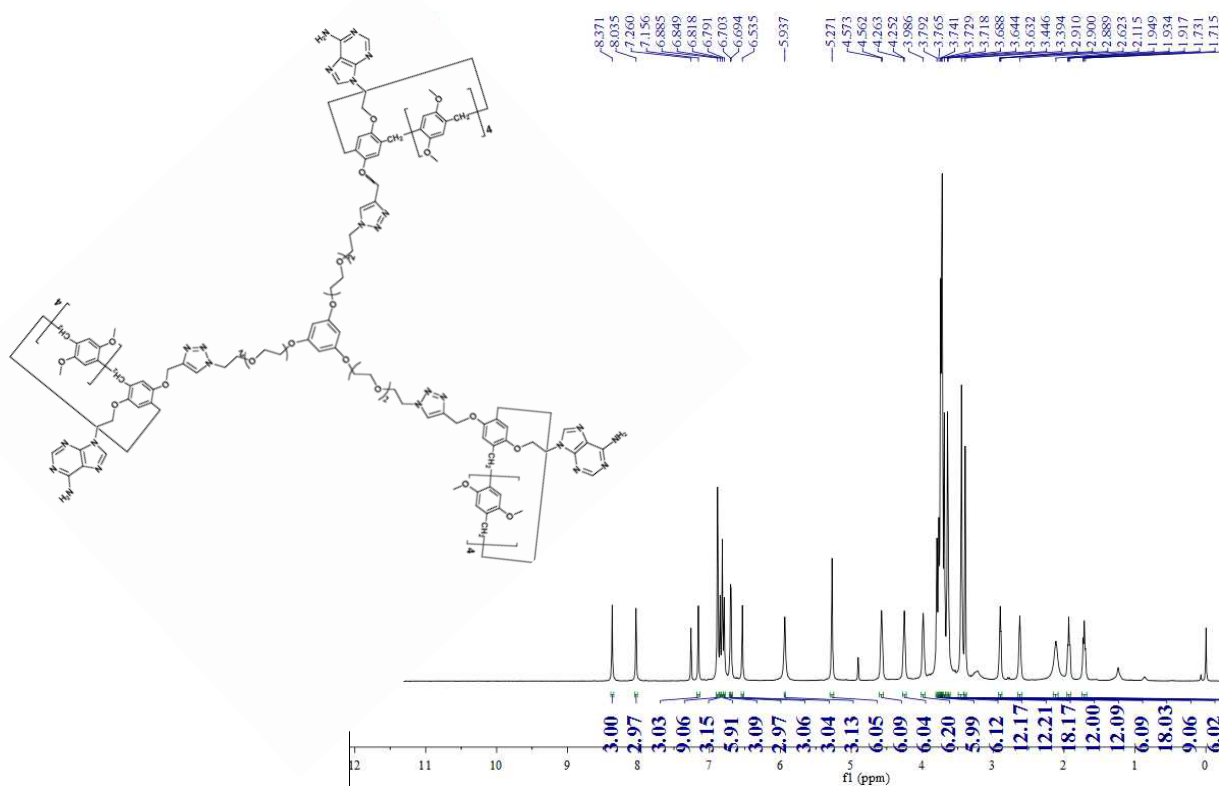

**Fig. S16** <sup>1</sup>H NMR spectrum for **H<sub>3</sub>** in CDCl<sub>3</sub>.

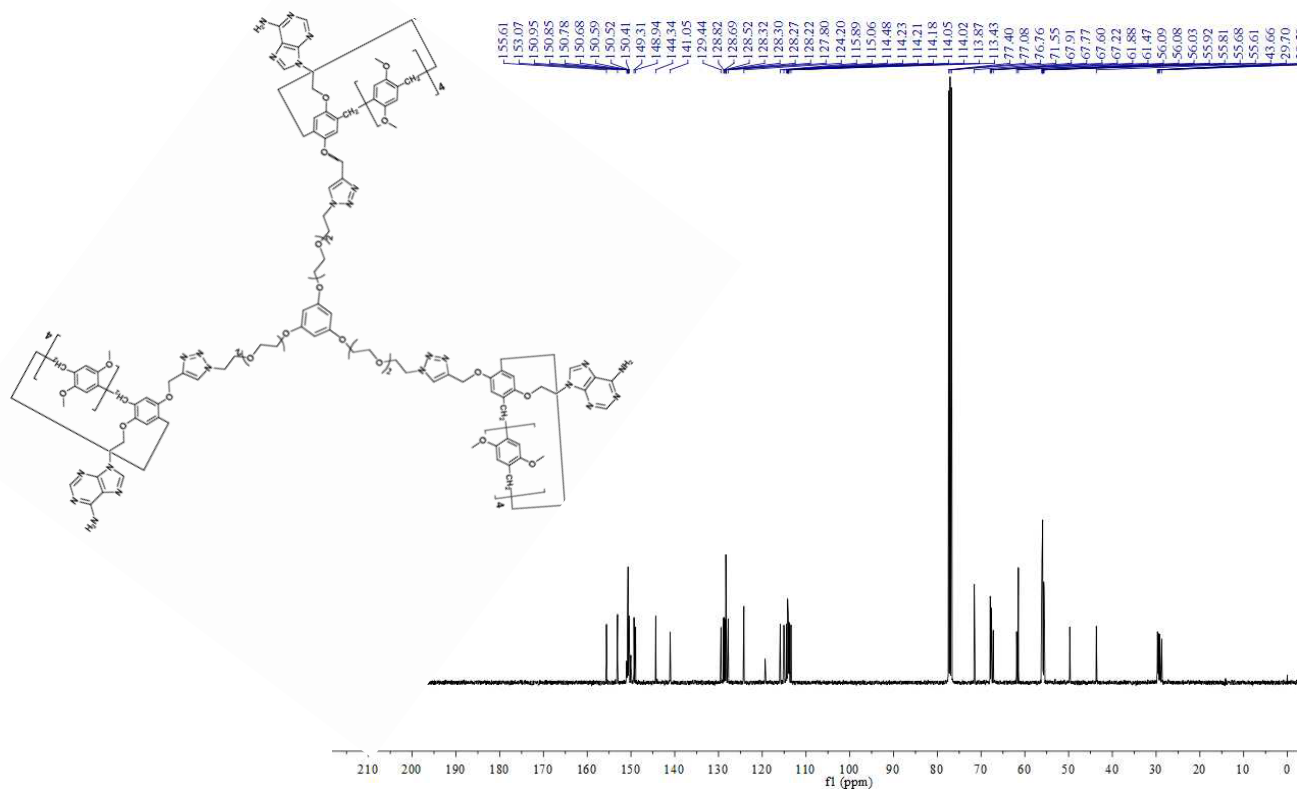

**Fig. S17**  $^{13}\text{C}$  NMR spectrum for **H3** in  $\text{CDCl}_3$ .

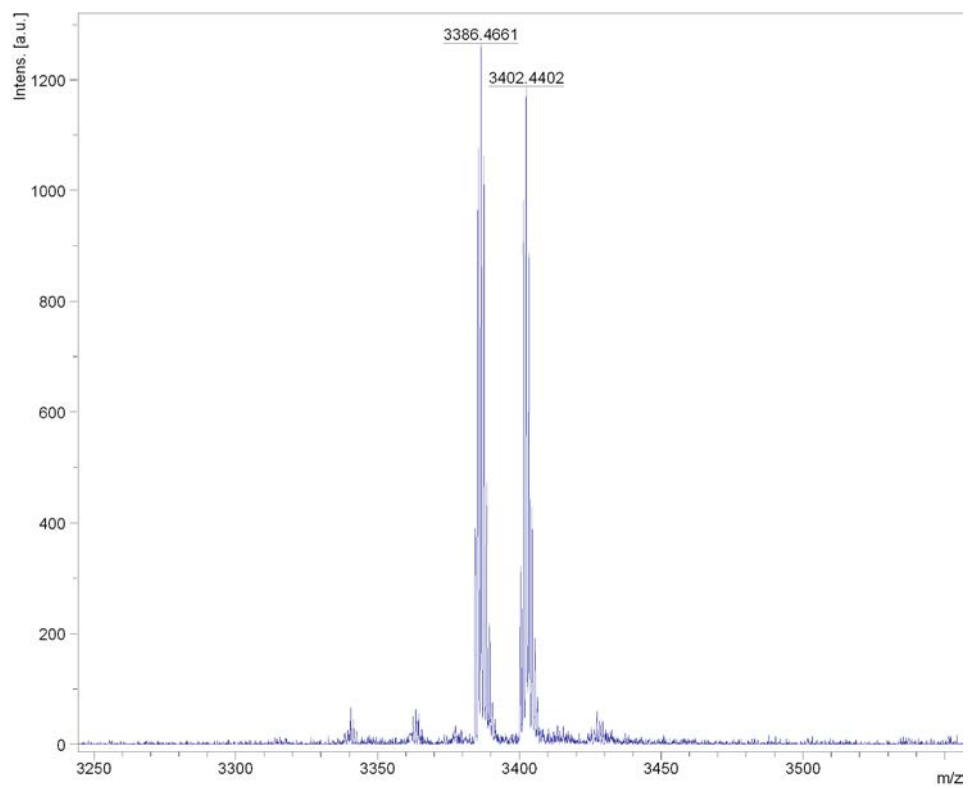

**Fig. S18** MALDI-TOF-MS spectrum of **H3**.

### 3 Determination of the binding stoichiometry, association constant and the maximum possible polymerization degrees ( $n_{\max}$ values) of HSP-H<sub>3</sub>G at different concentrations

#### Determination of the binding stoichiometry.

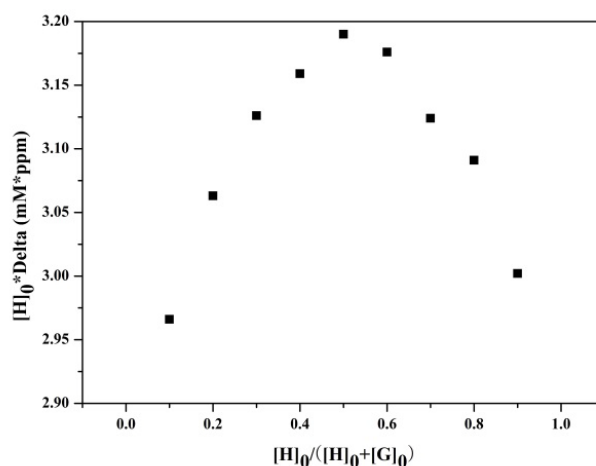

**Fig. S19** Job plots showing the 1:1 stoichiometry of the complex between **H** and **G** in CDCl<sub>3</sub>. The sum of initial concentration of **H** and **G** was 10.0 mM. Delta was chemical shift change of **H**<sub>5'</sub> of **G**.

#### Determination of association constant.

For **G**⊂**H** host-guest complex, chemical exchange was slow on the NMR time scale and peaks were observed for both complexed and uncomplexed species in the NMR spectra. So association constant ( $K_a$ ) for this complex could be determined by integration from a 1:1 mixture using the <sup>1</sup>H NMR single point method.<sup>S3</sup> Three solutions of equimolar mixtures of **G** and **H** (1.0, 1.5 and 2.0 mM) were measured and the  $K_a$  value for **G**⊂**H** complex was determined to be  $(7.2 \pm 0.2) \times 10^4 \text{ M}^{-1}$  in CDCl<sub>3</sub>.

$$K_a = \frac{[\text{H} \cdot \text{G}]_c}{[\text{H}]_{uc} [\text{G}]_{uc}}$$

### Calculated $n_{\max}$ values of HSP-H<sub>3</sub>G at different concentrations

For the present system in slow exchange on the NMR timescale, the maximum possible polymerization degrees ( $n_{\max}$ ) of **HSP-H<sub>3</sub>G** could be estimated using a well-defined method reported by Gibson *et al.*<sup>S4, S5</sup> From the slow-exchange NMR spectra of host-guest mixture in very dilute solutions, the extents of complexation are within the Weber rule limits of 20-80%, and the association constant for supramolecular polymer ( $K_{sp}$ ) can be calculated. Due to the hydrogen-bond interactions between two [2]pseudorotaxane are very strong, compound **5**<sup>S4b</sup> was used to replace guest **G** to determine the association constant  $K_{sp}$  and the  $K_{sp}$  was calculated as  $(6.0 \pm 0.2) \times 10^4$ .<sup>S4a</sup>

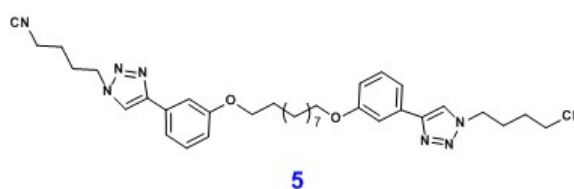

Fig. S20 The chemical structure of compound **5**.

Using the Carothers equation<sup>S5a</sup>, the maximum possible degree of polymerization ( $n_{\max}$ ) could be easily provide according to the following formula:

$$n_{\max} = (2K_{sp}[\text{Host}]_0)^{1/2},$$

where  $[\text{Host}]_0 = 2 [\text{H}_3]$  <sup>S4</sup>

**Table S1.** Calculated values of  $n_{\max}$  for **5**⊂**H<sub>3</sub>** at different initial concentrations of H<sub>3</sub> (3:2 molar ratio of **5** and H<sub>3</sub> in CDCl<sub>3</sub>). We think the  $n_{\max}$  for **G**⊂**H<sub>3</sub>** was similar with that of **5**⊂**H<sub>3</sub>**.

| [H <sub>3</sub> ] (mM) | $n_{\max}$ |
|------------------------|------------|
| 20.0                   | $69 \pm 3$ |
| 17.0                   | $64 \pm 3$ |
| 13.3                   | $56 \pm 2$ |
| 10.0                   | $49 \pm 1$ |
| 7.8                    | $43 \pm 1$ |

#### 4 DOSY experiments

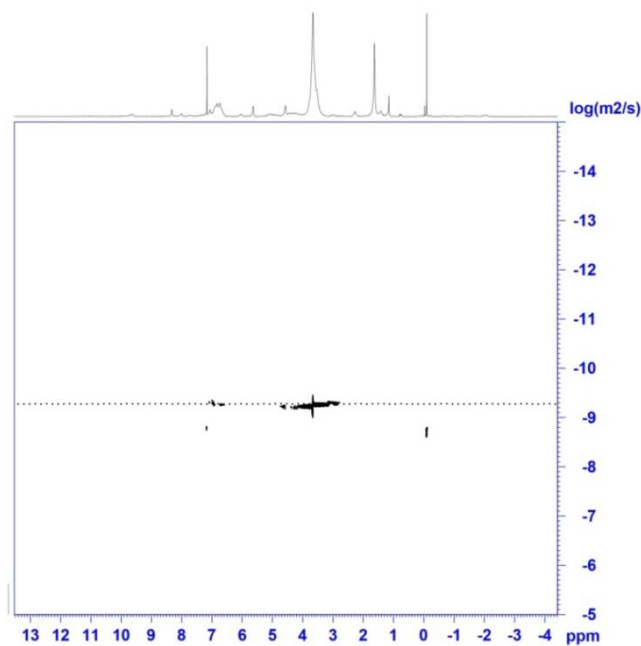

**Fig. S21** DOSY NMR spectrum (600 MHz, CDCl<sub>3</sub>, 298K) of the mixed solution of **H<sub>3</sub>** (1.7 mM) and **G** (5.1 mM). One set of signals could be observed from the DOSY spectrum ( $D = 2.2 \times 10^{-9} \text{ m}^2 \text{ S}^{-1}$ ).

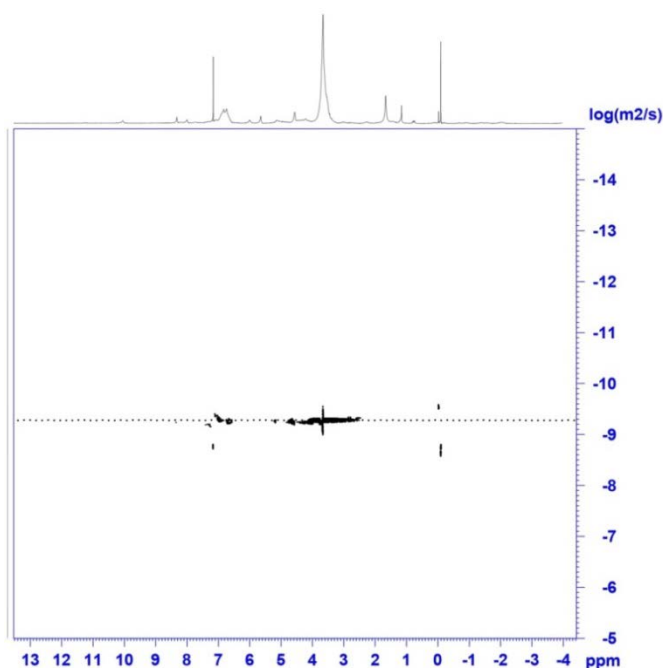

**Fig. S22** DOSY NMR spectrum (600 MHz, CDCl<sub>3</sub>, 298K) of the mixed solution of **H<sub>3</sub>** (3.3 mM) and **G** (9.9 mM). One set of signals could be observed from the DOSY spectrum ( $D = 2.1 \times 10^{-9} \text{ m}^2 \text{ S}^{-1}$ ).

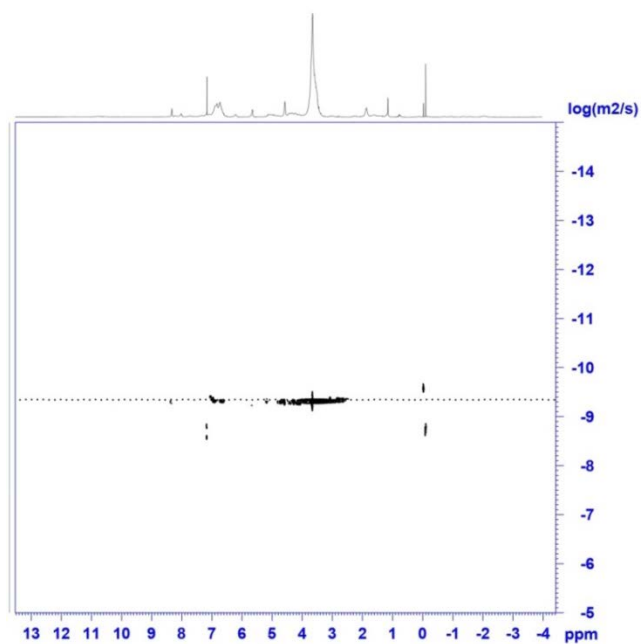

**Fig. S23** DOSY NMR spectrum (600 MHz,  $\text{CDCl}_3$ , 298 K) of the mixed solution of **H<sub>3</sub>** (6.7 mM) and **G** (20.1 mM). One set of signals could be observed from the DOSY spectrum ( $D = 1.5 \times 10^{-9} \text{ m}^2 \text{ S}^{-1}$ ).

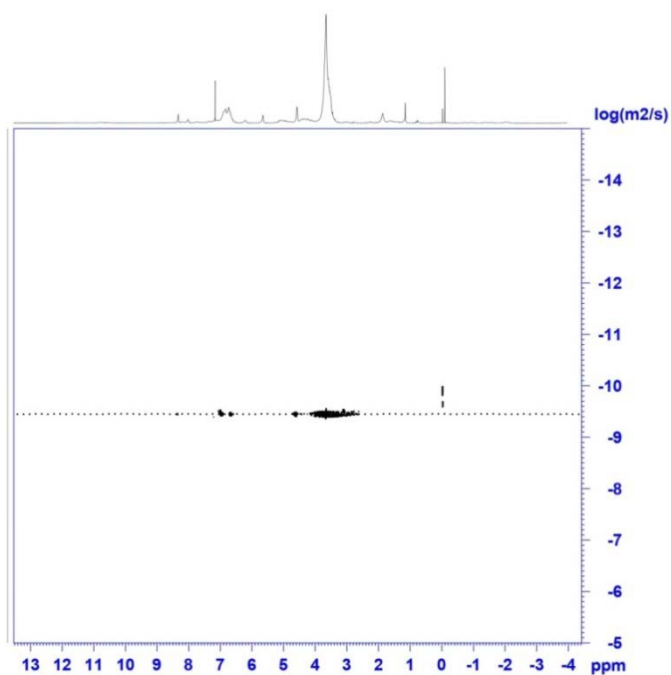

**Fig. S24** DOSY NMR spectrum (600 MHz,  $\text{CDCl}_3$ , 298K) of the mixed solution of **H<sub>3</sub>** (10.0 mM) and **G** (30.0 mM). One set of signals could be observed from the DOSY spectrum ( $D = 1.3 \times 10^{-9} \text{ m}^2 \text{ S}^{-1}$ ).

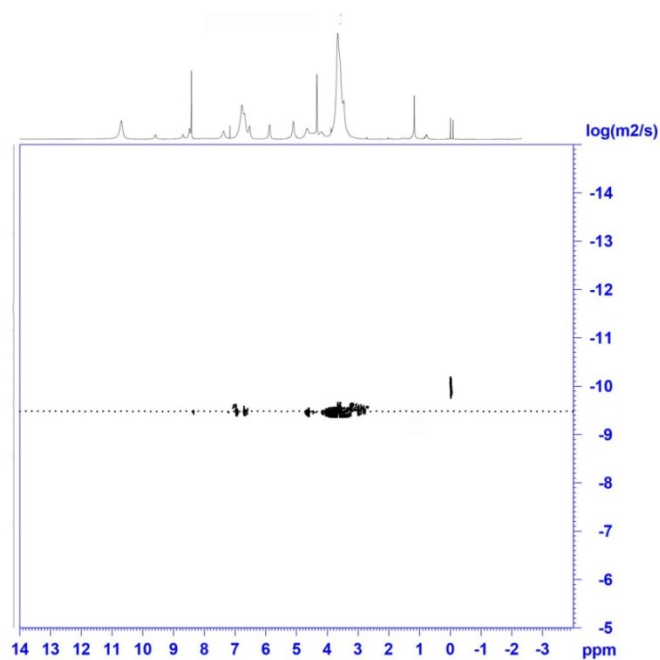

**Fig. S25** DOSY NMR spectrum (600 MHz,  $\text{CDCl}_3$ , 298K) of the mixed solution of **H<sub>3</sub>** (13.3 mM) and **G** (39.9 mM). One set of signals could be observed from the DOSY spectrum ( $D = 1.2 \times 10^{-9} \text{ m}^2 \text{ S}^{-1}$ ).

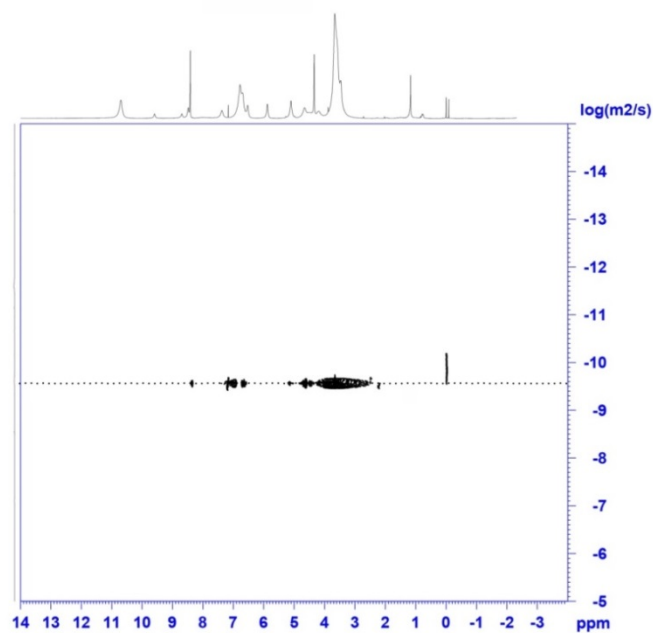

**Fig. S26** DOSY NMR spectrum (600 MHz,  $\text{CDCl}_3$ , 298K) of the mixture of **H<sub>3</sub>** (17.0 mM) and **G** (51.0 mM). One set of signals could be observed from the DOSY spectrum ( $D = 1.0 \times 10^{-9} \text{ m}^2 \text{ S}^{-1}$ ).

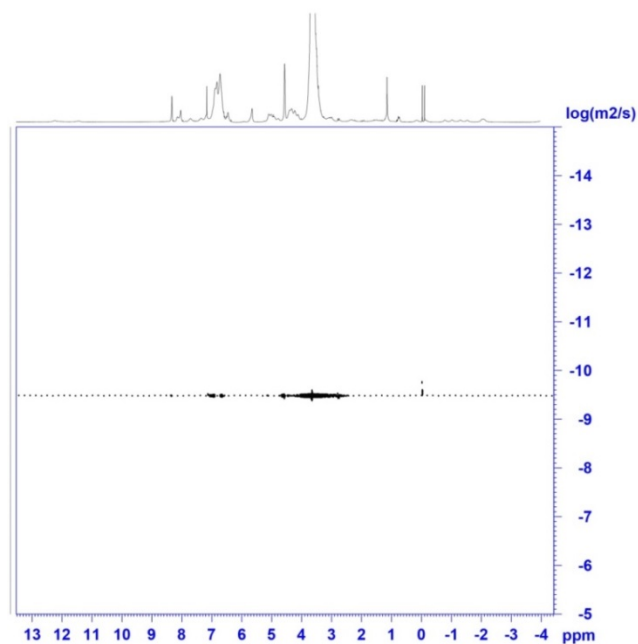

**Fig. S27** DOSY NMR spectrum (600 MHz, CDCl<sub>3</sub>, 298K) of the mixed solution of **H<sub>3</sub>** (20.0 mM) and **G** (60.0 mM). One set of signals could be observed from the DOSY spectrum ( $D = 6.1 \times 10^{-10} \text{ m}^2 \text{ S}^{-1}$ ).

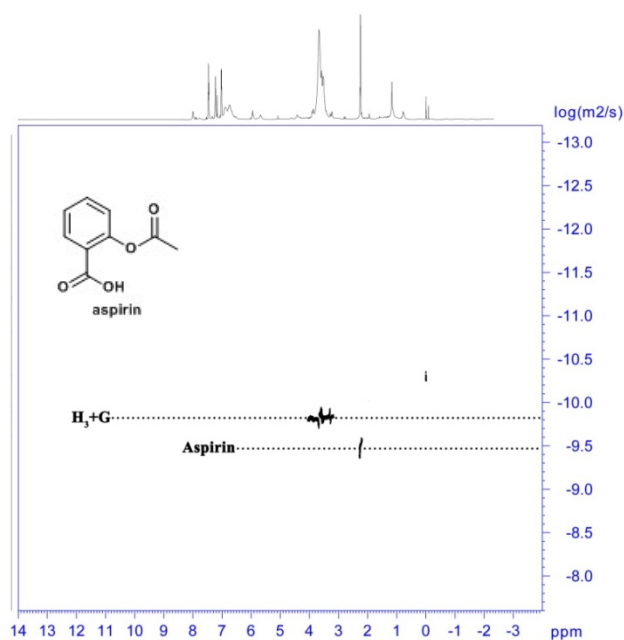

**Fig. S28** DOSY NMR spectrum (600 MHz, CDCl<sub>3</sub>, 298K) of the mixed solution of **H<sub>3</sub>** (20.0 mM), **G** (60.0 mM) and **aspirin** (60.0mM). Signals corresponding to **H<sub>3</sub>+G** could be observed from the DOSY spectrum ( $D = 1.2 \times 10^{-9} \text{ m}^2 \text{ S}^{-1}$ ).

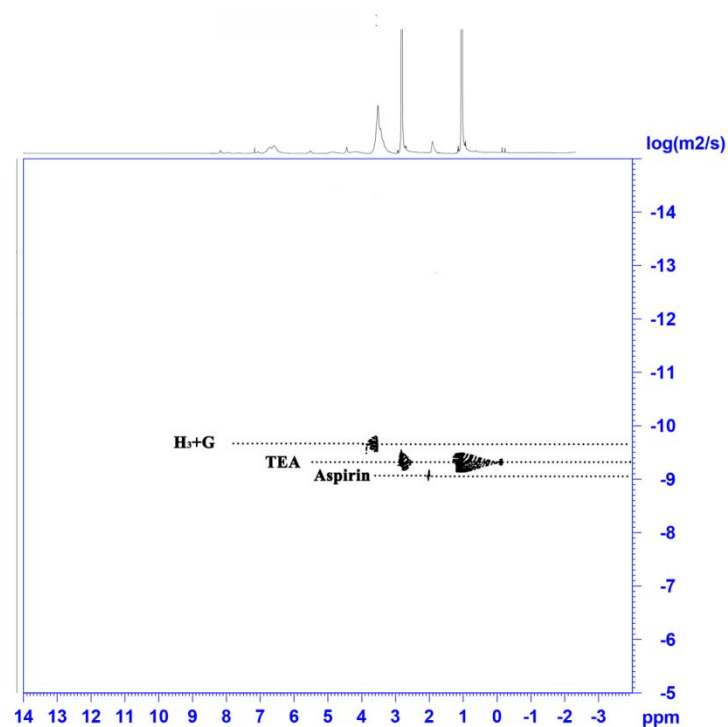

**Fig. S29** DOSY NMR spectrum (600 MHz,  $\text{CDCl}_3$ , 298K) of the mixed solution of **H<sub>3</sub>** (20.0 mM), **G** (60.0 mM), **aspirin** (60.0 mM) and **Et<sub>3</sub>N** (63.0 mM). Signals corresponding to **H<sub>3</sub>+G** could be observed from the DOSY spectrum ( $D = 6.0 \times 10^{-10} \text{ m}^2 \text{ S}^{-1}$ ).

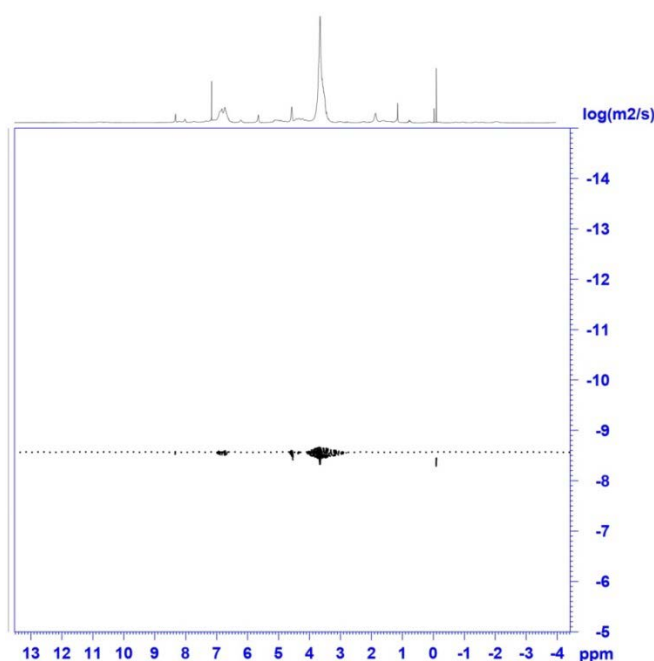

**Fig. S30** DOSY NMR spectrum (600 MHz,  $\text{CDCl}_3$ , 323K) of the mixture of **H<sub>3</sub>** (20.0 mM) and **G** (60.0 mM). One set of signals could be observed from the DOSY spectrum ( $D = 1.0 \times 10^{-8} \text{ m}^2 \text{ S}^{-1}$ ).

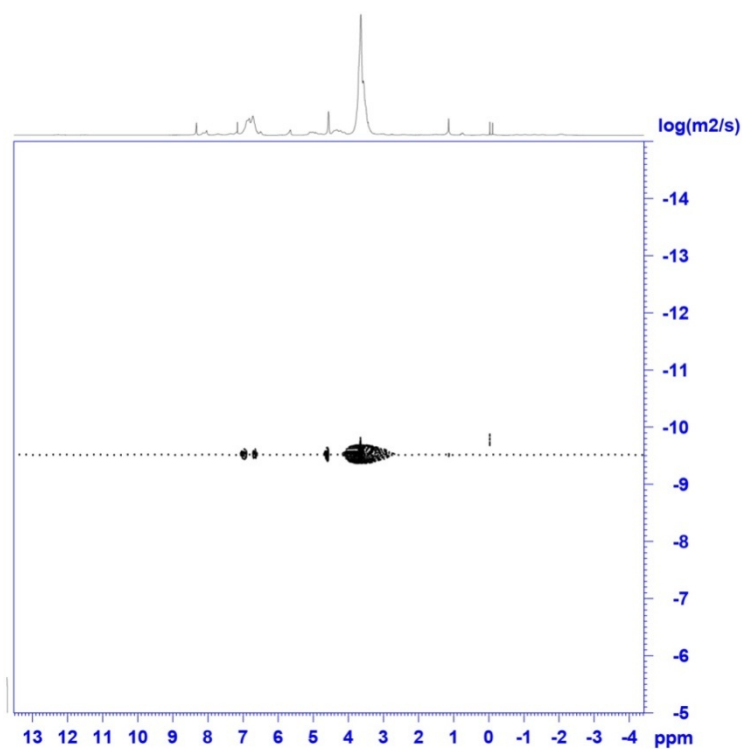

**Fig. S31** DOSY NMR spectrum (600 MHz,  $\text{CDCl}_3$ , 298K) of the solution cooled from 323K. One set of signals could be observed from the DOSY spectrum ( $D = 5.8 \times 10^{-10} \text{ m}^2 \text{ S}^{-1}$ ).

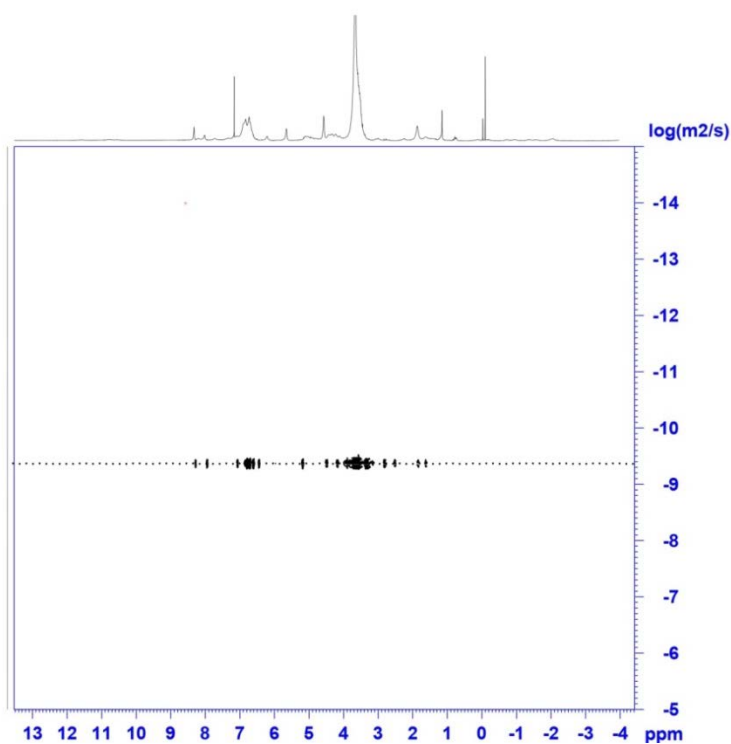

**Fig. S32** DOSY NMR spectrum (600 MHz,  $\text{CDCl}_3$ , 298 K) of  $\text{H}_3$  at 20.0 mM. One set of signals could be observed from the DOSY spectrum ( $D = 1.2 \times 10^{-9} \text{ m}^2 \text{ S}^{-1}$ ).

## 5. Viscosity experiments

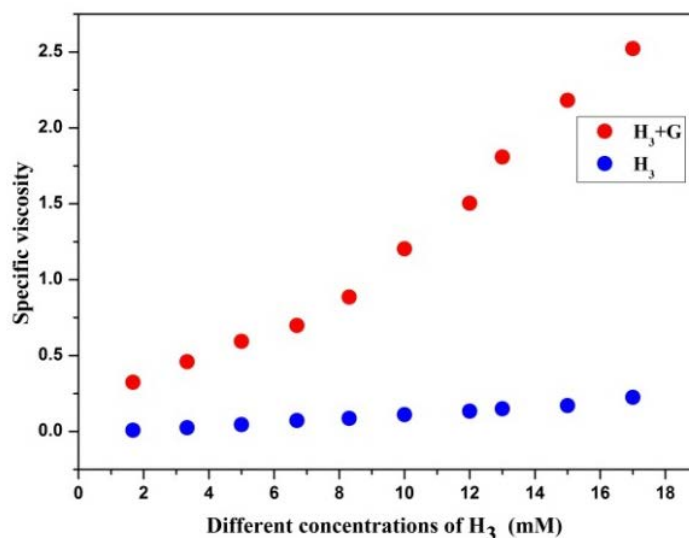

**Fig. S33** Specific viscosity of **HSP-H<sub>3</sub>G** (●) and **H<sub>3</sub>** (●) in CHCl<sub>3</sub> at 298 K versus **H<sub>3</sub>** concentration.

## 6. The morphology of the supramolecular polymer HSP-H<sub>3</sub>G

Different concentrations of **HSP-H<sub>3</sub>G** solution were used to preparing SEM samples and varisized nanoparticles were found in SEM images. Typical images were shown in Fig. S34 and large spherical nanoparticles were observed. The aggregation of the supramolecular polymers was random and thus the nanoparticles in SEM image were not uniform. Such spherical morphology was similar to the reports by Martin<sup>S6</sup> and Li<sup>S7</sup>.

(a)

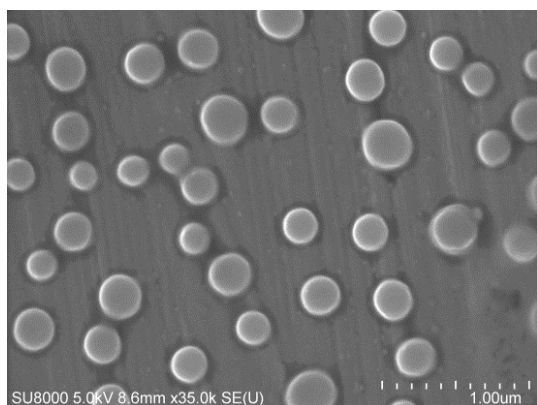

(b)

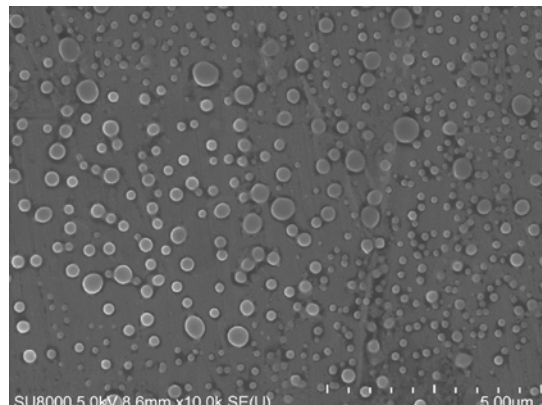

**Fig. S34** SEM images of supramolecular polymer HSP-H<sub>3</sub>G. (a) Sample were prepared from 20 mM solution; (b) Sample were prepared from 15

mM solution.

## References

---

- S1 F. P. V. Paoloni, S. Kelling, J. Huang and S. R. Elliott, *Adv. Funct. Mater.*, 2011, **21**, 372–379.
- S2 A. Goujon, T. Lang, G. Mariani, E. Moulin, G. Fuks, J. Raya, E. Buhler and N. Giuseppone, *J. Am. Chem. Soc.*, 2017, **139**, 14825–14828.
- S3 Association constants determined using the  $^1\text{H}$  NMR single point methods. See:
- (a) A. B. Braunschweig, C. M. Ronconi, J. -Y. Han, F. Arico, S. J. Cantrill, J. F. Stoddart, S. I. Khan, A. J. P. White and D. J. Williams, *Eur. J. Org. Chem.* 2006, 1857–1866; (b) S. J. Loeb and J. A. Wisner, *Angew. Chem. Int. Ed.* 1998, **37**, 2838–2840; (c) S. J. Loeb, J. Tiburcio and S. J. Vella, *Org. Lett.* 2005, **7**, 4923–4926; (d) J. -M. Zhao, Q. -S. Zong, T. Han, J. -F. Xiang and C. -F. Chen, *J. Org. Chem.* 2008, **73**, 6800–6806; (e) C. Li, S. Chen, J. Li, K. Han, M. Xu, B. Hu, Y. Yu and X. Jia, *Chem. Commun.*, 2011, **47**, 11294–11296.
- S4 (a) H. W. Gibson, N. Yamaguchi and J. W. Jones, *J. Am. Chem. Soc.*, 2003, **125**, 3522–3533; (b) C. Li, K. Han, J. Li, Y. Zhang, W. Chen, Y. Yu and X. Jia, *Chem. Eur. J.*, 2013, **19**, 11892–11897.
- S5 (a) C. H. Carothers, *Trans. Faraday Soc.* 1936, **32**, 39–53; (b) R. P. Sijbesma, F. H. Beijer, L. Brunsveld, B. J. B. Folmer, J. H. K. K. Hirschberg, R. F. M. Lange, J. K. L. Lowe and E. W. Meijer, *Science* 1997, **278**, 1601–1604.
- S6 G. Fernández, E. M. Pérez, L. Sánchez and N. Martín, *J. Am. Chem. Soc.*, 2008, **130**, 2410–2411.
- S7 X. Wang, H. Deng, J. Li, K. Zheng, X. Jia, and C. Li, *Macromol. Rapid Commun.*, 2013, **34**, 1856–1862.
